# Supplementary material
Source: Springer Nature journal article supplement (https://www.springermedizin.de/resource/supplementary/12974_2009_214_MOESM3_ESM.pdf/9601046)

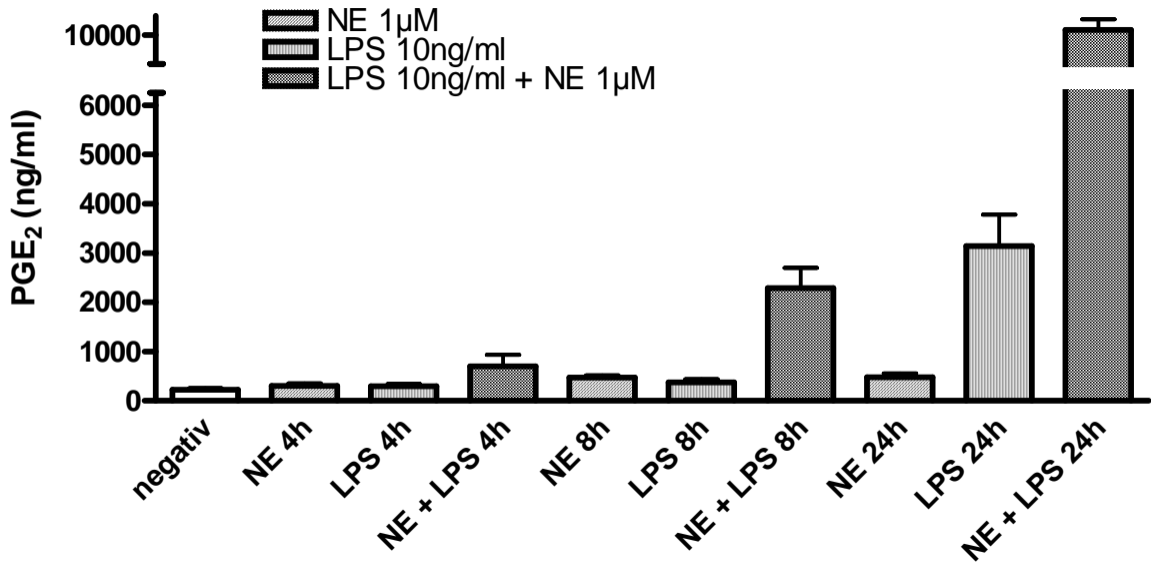

Supplement: MOESM3 [file 9601046]
